# Supplementary material for: Porphyromonas gingivalis in Alzheimer’s disease brains: Evidence for disease causation and treatment with small-molecule inhibitors
Source: PubMed Central journal article supplement (PMC6357742; doi:10.1126/sciadv.aau3333), 2019-01-23
Supplement: aau3333_SM.pdf [file aau3333_SM.pdf]

## Supplementary Materials for

### ***Porphyromonas gingivalis* in Alzheimer's disease brains: Evidence for disease causation and treatment with small-molecule inhibitors**

Stephen S. Dominy\*, Casey Lynch, Florian Ermini, Malgorzata Benedyk, Agata Marczyk, Andrei Konradi, Mai Nguyen, Ursula Haditsch, Debasish Raha, Christina Griffin, Leslie J. Holsinger, Shirin Arastu-Kapur, Samer Kaba, Alexander Lee, Mark I. Ryder, Barbara Potempa, Piotr Mydel, Annelie Hellvard, Karina Adamowicz, Hatice Hasturk, Glenn D. Walker, Eric C. Reynolds, Richard L. M. Faull, Maurice A. Curtis, Mike Dragnow, Jan Potempa

\*Corresponding author. Email: sdominy@cortexyme.com

Published 23 January 2019, *Sci. Adv.* 5, eaau3333 (2019)  
DOI: 10.1126/sciadv.aau3333

#### **This PDF file includes:**

- Fig. S1. CAB101 analysis of non-AD neurological disease brain microarrays.
- Fig. S2. RgpB IHC in hippocampal samples from nondemented and AD patients.
- Fig. S3. Sequencing of *P. gingivalis hmuY* PCR products from AD brains.
- Fig. S4. Sequencing of *P. gingivalis hmuY* PCR products from clinical AD CSF.
- Table S1. NVD003 AD and control TMA patient data.
- Table S2. NVD005 AD and control TMA patient data.
- Table S3. Tau fragments identified by MS after gingipain exposure.
- Table S4. Demographic information of patients with CP who donated saliva and subgingival plaque samples.

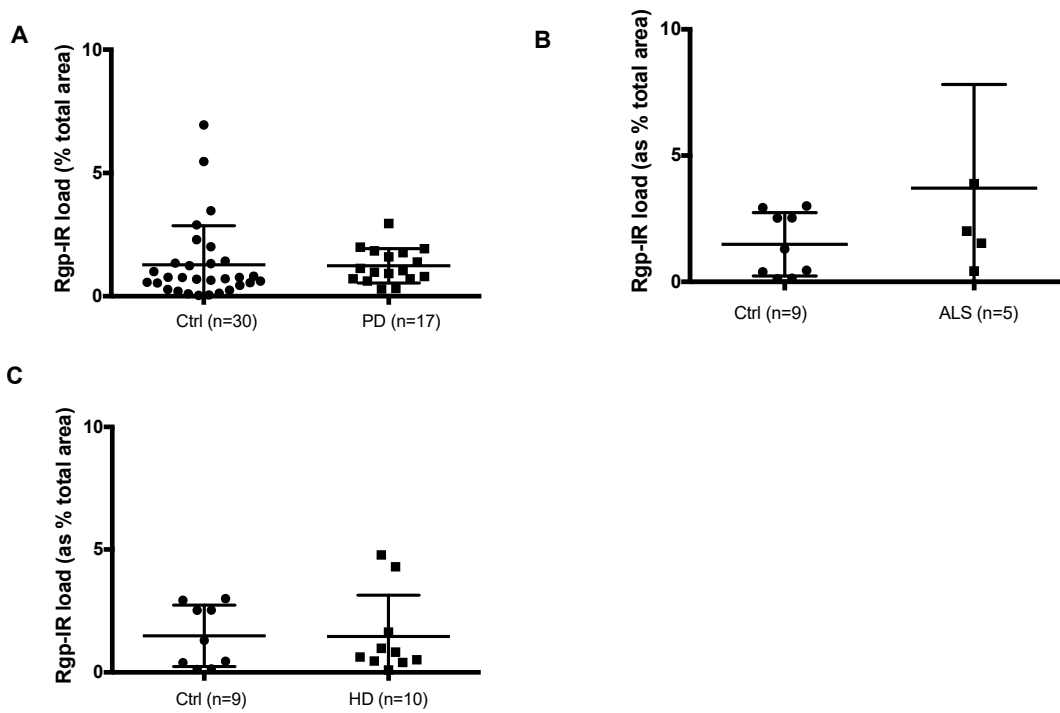

**Fig. S1. CAB101 analysis of non-AD neurological disease brain microarrays.** CAB101 staining of middle temporal gyrus for RgpB in (A) Parkinson’s disease (PD), (B) amyotrophic lateral sclerosis (ALS), and (C) Huntington’s disease (HD), reveals no significant difference when compared to control brain staining.

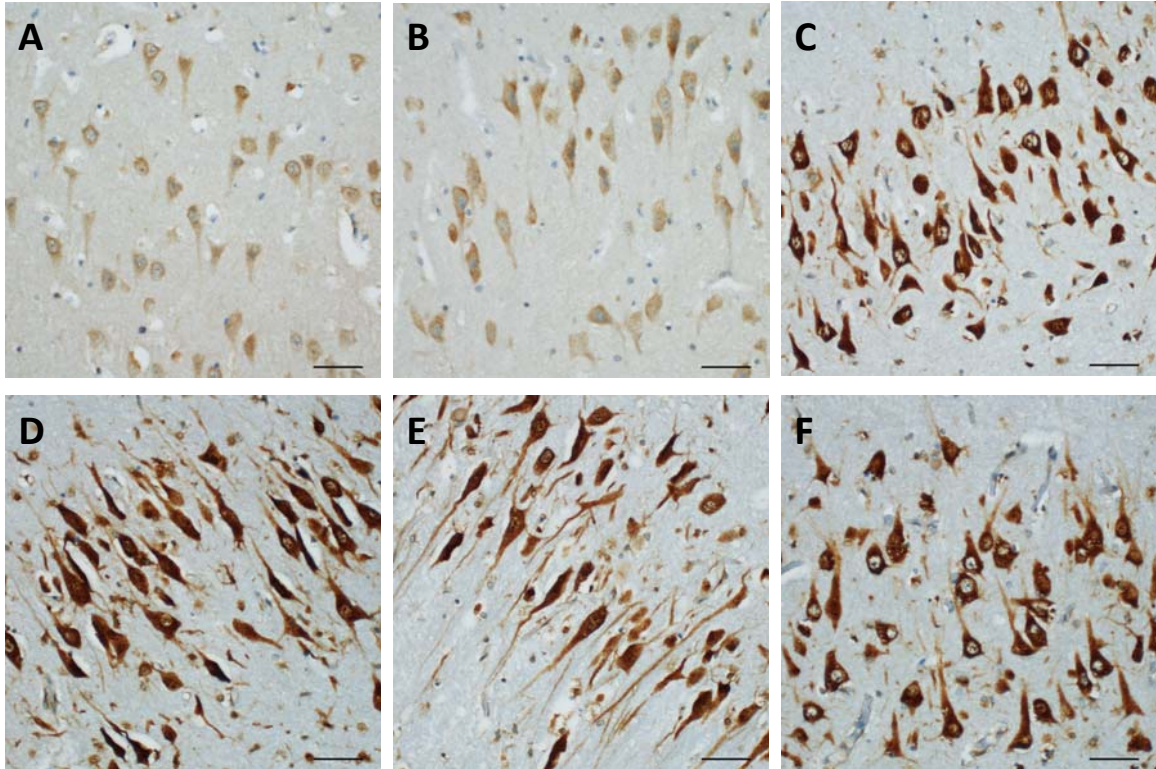

**Fig. S2. RgpB IHC in hippocampal samples from nondemented and AD patients.** RgpB IHC with monoclonal antibody 18E6 on pyramidal neurons of the CA3 region of the hippocampus was performed in a sample set obtained from a university brain bank with accompanying pathological diagnosis (n=14). Representative images of different levels of RgpB staining (brown color) in non-demented control (n=4) and AD diagnosed patients (n=10). Age, dementia status, and pathologic diagnosis for each subject are as follows: **(A)** 75-yo non-demented, no AD pathology. **(B)** 33-yo non-demented, very earliest forms of senile plaques. **(C)** 83-yo non-demented, minimal cognitive impairment (MCI), very mild AD pathology. **(D)** 66-yo demented, severe AD pathology. **(E)** 87-yo demented, severe AD pathology. **(F)** 61-yo demented, severe AD pathology. Scale bars 50  $\mu$ m.

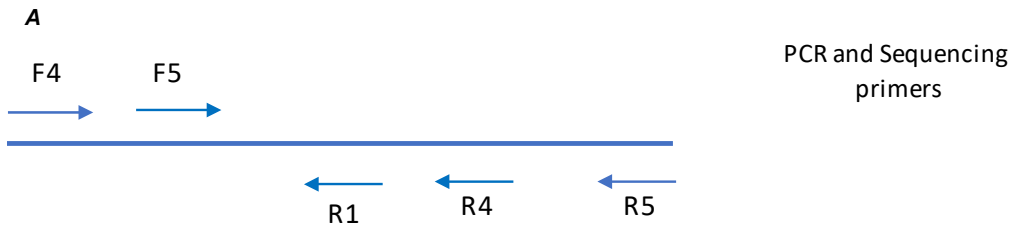

**B**

| Disease State | Subject ID | PCR Primers | Sequencing Primers | % Identity |
|---------------|------------|-------------|--------------------|------------|
| AD            | 83y        | F5, R4      | R1, R4             | 100, 100   |
| AD            | 90y        | F5, R4      | R1, R4             | 99, 100    |
| AD            | 80y        | F5, R5      | R5, R4             | 100,99     |

**C**

**83y\_R1**

TTACCACTTTTCGCCACAATTGAGACGAACGTCATAGCGGTGAAGAGCCATGTCCCAGTTCAAATCGTTCTTA  
TAGTCGGTAACATTTACGACTTCACCTTTGGAAAAAGAGAAATACTGCCACGTTTCGTATTTTGAAGCATCG  
ATAGTTACGGTTTTGGTTACTGT

**83y\_R4**

AGCAGGCCGATGAGGGCCTGCTTTGTTACTACACTTTTTCATATTTCCCTCTTAACTTATTTAACGGGGTATG  
TATAAGTGAAAGTGATGACTCCTTTTTTGGAGTTCTGCATCCTGATAGTCAGTGAAGTGCCTTTGGCAATAT  
TACCATCAGCACCACGAACGAAGAAGACTCTTTTGTCTCAGCTTGTAAGTGGGACCGGCAGGACCGTGAGAGA  
ATTCAGCCAACCACCTGAAGCAAATCCCTGTGCGTCTTCTTGCCGGTAATCACTTCGCTGAAGCCCTGTT  
CTTCATATTCATCTGATGACCATCAGGTCCCATTTTCGTAAGTACTGTAATACGGCCGAGAATACGGCACCACCTTTTC  
TATATCCGTCTGTGCGAACGGTAGTAGCCTGATCCATTTCTGTCTTGCCGGAGAATACGGCACCACCTTTTC  
CCTTACCACTTTTCGCCACAATTGAGACGAACGTCATAGCGGTGAAGAGCCATGTCCCAGTTCAAATCGTTCT  
TATAGTCGGTAACATTTACGACTTCACCTTTGGAAAAAGAGAAATACTGCCACGTTTCGTATTTTGAAGCAT  
CGATAGTTACGGTTTTGGTTACTG

**90y\_R4**

TACTTATACTAAAGAAAAGCAGGCCGATGAGGGCCTGCTTTGTTACTACACTTTTTCATATTTCCCTCTTAACT  
TTATTTAACGGGGTATGTATAAGTGAAAGTGATGACTCCTTTTTTGGAGTTCTGCATCCTGATAGTCAGTGA  
ACTGCCTTTGGCAATATTACCATCAGCACCACGAACGAAGAAGACTCTTTTGTCTCAGCTTGTAAGTGGGAC  
CGGCAGGACCGTGAGAGAATTCAGCCAACCACCTGAAGCAAATCCCTGTGCGTCTTCTTGCCGGTAATCA  
CTTCGCTGAAGCCCTGTTCTTCATATTCATCTGATGACCATCAGGTCCCATTTTCGTAAGTACTGTAATAC  
GGCCGAGAATCTACAGTATATCCGTCTGTGCGAACGGTAGTAGCCTGATCCA8100TTTCTGTCTTGCCG  
GAGAATACGGCACCACCTTTTCCCTTACCACTTTTCGCCACAATTGAGACGAACGTCATAGCGGTGAAGAGCC  
ATGTCCCAGTTCAAATCGTTCTTATAGTCGGTAACATTTACGACTTCACCTTTGGAAAAAGAGAAATACTGC  
CACGTTTCGTATTTTGAAGCATCGATAGTTACGGTTTTGGTTACTGCTT

**90y\_R1**

CCTTTTCCCTTACCACTTTCGCCACAATTGAGACGAACGTCATAGCGGTGAAGAGCCATGTCCCAGTTCAAA  
TCGTTCTTATAGTCGGTAACATTTACGACTTCACCTTTGGAAAAAGAGAAATACTGCCACGTTTCGTATTTTC  
GAAGCATCGATAGTTACGGTTTTGGTTACTGCTTCGGGTGTGGAA

**80y\_R5**

ATACTTATACTAAAGAAAAGCAGGCCGATGAGGGCCTGCTTTGTTACTACACTTTTCATATTTCCCTCTTAA  
CTTATTTAACGGGGTATGTATAAGTGAAAGTGATGACTCCTTTTTTTGAGTTCTGCATCCTGATAGTCAGTG  
AACTGCACTTTGGCAATATTACCATCAGCACCACGAACGAAGAAGACTCTTTTGCTCAGCTTGTAAGTGGGA  
CCGGCAGGACCGTGAGAGAATTCCAGCCAACCACCTGAAGCAAATCCCTGTGCGTTCTTCTTGCCGGTAATC  
ACTTCGCTGAAGCCCTGTTCTTCATATTCATCTGATGACCATCAGGTCCCATTTTCGTACTTGACTGTAATA  
CGGCCGAGAACATCTACAGTATATCCGTCTGTGCGAACGGTAGTAGCCTGATCCATTTCTGTCTTGCCGGAG  
AATACGGCACCACCTTTTCCCTTACCACTTTCGCCACAATTGAGACGAACGTCATAGCGGTGAAGAGCCATG  
TCCCAGTTCAAATCGTTCTTATAGTCGGTAACATTTACGACTTCACCTTTGGAAAAAGAGAAATACTGCCAC  
GTTTCGTATTTTGAAGCATCGATAGTTACGGTTTTGGTTACTG

**80y\_R4**

TACTTATACTAAAGAAAAGCAGGCCGATGAGGGCCTGCTTTGTTACTACACTTTTCATATTTCCCTCTTAA  
TTATTTAACGGGGTATGTATAAGTGAAAGTGATGACTCCTTTTTTTGAGTTCTGCATCCTGATAGTCAGTGA  
ACTGCACTTTGGCAATATTACCATCAGCACCACGAACGAAGAAGACTCTTTTGCTCAGCTTGTAAGTGGGAC  
CGGCAGGACCGTGAGAGAATTCCAGCCAACCACCTGAAGCAAATCCCTGTGCGTTCTTCTTGCCGGTAATCA  
CTTCGCTGAAGCCCTGTTCTTCATATTCATCTGATGACCATCAGGTCCCATTTTCGTACTTGACTGTAATAC  
GGCCGAGAACATCTACAGTATATCCGTCTGTGCGAACGGTAGTAGCCTGATCCATTTCTGTCTTGCCGGAGA  
ATACGGCACCACCTTTTCCCTTACCACTTTCGCCACAATTGAGACGAACGTCATAGCGGTGAAGAGCCATGT  
CCCAGTTCAAATCGTTCTTATAGTCGGTAACATTTACGACTTCACCTTTGGAAAAAGAGAAATACTGCCACG  
TTTTCGTATTTTGAAGCATCGATAGTTACGGTTTTGGTTACTGCT

**D**

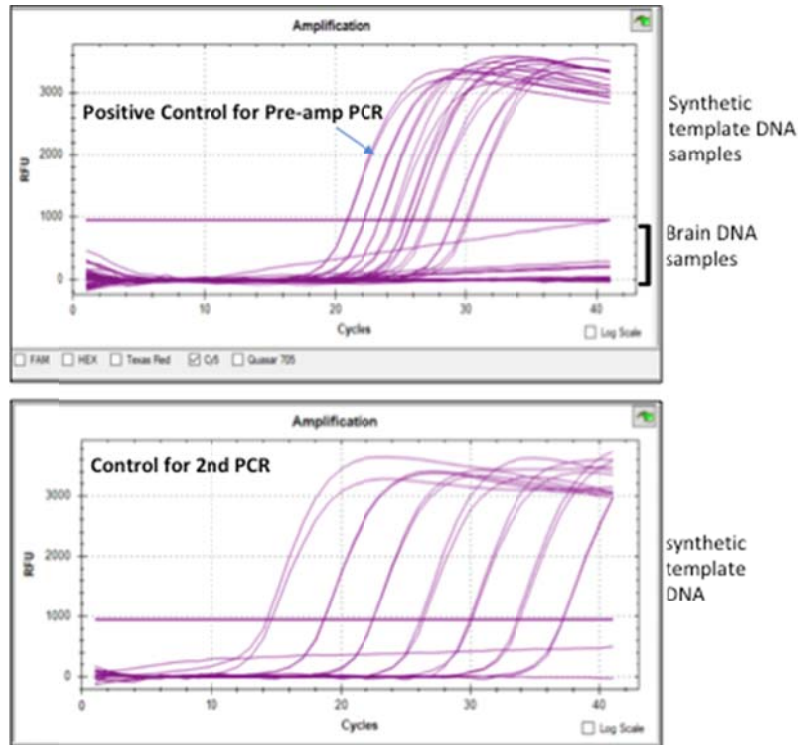

**Fig. S3. Sequencing of *P. gingivalis hmuY* PCR products from AD brains.** (A) PCR-sequencing strategy for the *P. gingivalis hmuY* gene. (B) Data table includes subject disease state and subject ID used in Fig. 3 of main text, sequencing primers used, and sequencing identity of PCR products to *P. gingivalis hmuY* DNA sequence. (C) PCR product sequences for each AD subject. (D) *H. pylori* synthetic template DNA samples used as positive control for PCR of human AD brains.

A

| Subject ID | MMSE Score | Age | PCR primers   | Sequencing Primers | % Identity |
|------------|------------|-----|---------------|--------------------|------------|
| AD2        | 15         | 59  | H1.2 and H1.1 | H1.1 For and Rev   | 100, 99    |
| AD4        | 17         | 72  | H1.2 and H1.1 | H1.1 For and Rev   | 100, 99    |
| AD6        | 18         | 60  | H1.2 and H1.1 | H1.1 For and Rev   | 100, 97    |
| AD7        | 18         | 60  | H1.2 and H1.1 | H1.1 For and Rev   | 100, 99    |
| AD8        | 18         | 59  | H1.2 and H1.1 | H1.1 For and Rev   | 100, 100   |
| AD9        | 18         | 62  | H1.2 and H1.1 | H1.1 For and Rev   | 99, 99     |
| AD10       | 20         | 61  | H1.2 and H1.1 | H1.1 For and Rev   | 99, 98     |

B

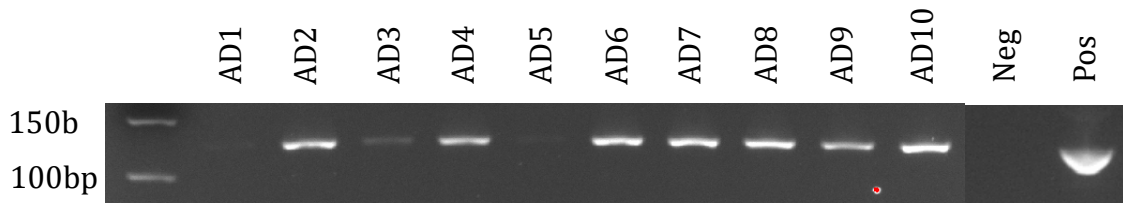

C

**AD2\_H1.1 For**

TGGTAAGGGAAAAGGTGGTGCCGTATTCTCCGGCAAGACAGAAATGGATCAGGCTACTA  
CC

**AD2\_H1.1 Rev**

CCTTTTCCTTACCACTTTTCGCCACAATTGAGACGAACGTCATAGCGGTGAAGAGCCATGT  
CCCAGTTCAAATCGTTA

**AD4\_H1.1 For**

TGGTAAGGGAAAAGGTGGTGCCGTATTCTCCGGCAAGACAGAAATGGATCAGGCTACTA  
CCGTAA

**AD4\_H1.1 Rev**

CCTTTTCCTTACCACTTTTCGCCACAATTGAGACGAACGTCATAGCGGTGAAGAGCCATGT  
CCCAGTTCAAATC

**AD6\_H1.1 For**

TGGTAAGGGAAAAGGTGGTGCCGTATTCTCCGGCAAGACAGAAATGGATCAGGCTACTA  
CC

**AD6\_H1.1 Rev**

CCTTTTCCCTTACCACTTTNNGCCACAATTGAGACGAACGTCATAGCGGTGAAGAGCCAT  
GTCCCAGTTCAAATCGTTAAAA

**AD7\_H1.1 For**

GGTAAGGGAAAAGGTGGTGCCGTATTCTCCGGCAAGACAGAAATGGATCAGGCTACTAC  
C

**AD7\_H1.1 Rev**

CGGCACCACCTTTTCCTTACCACTTTCGCCACAATTGAGACGAACGTCATAGCGGTGAAG  
AGCCATGTCCCAGTTCAAATC

**AD8\_H1.1 For**

TGGTAAGGGAAAAGGTGGTGCCGTATTCTCCGGCAAGACAGAAATGGATCAGGCTACTA  
CCG

**AD8\_H1.1 Rev**

CCTTTTCCTTACCACTTTCGCCACAATTGAGACGAACGTCATAGCGGTGAAGAGCCATGT  
CCCAGTTCAAATC

**AD9\_H1.1 For**

TTCGTCTCATTGTGGCGAAAGTGGTAAGGGAAAAGGTGGTGCCGTATTCTCCGGCAAGA  
CAGAAATGGATCAGGCTACTACCGT

**AD9\_H1.1 Rev**

CCTTTTCCTTACCACTTTCGCCACAATTGAGACGAACGTCATAGCGGTGAAGAGCCATGT  
CCCAGTTCAAATCGTTCC

**AD10\_H1.1 For**

GTTTCGTCTCATTGTGGCGAAAGTGGTAAGGGAAAAGGTGGTGCCGTATTCTCCGGCAAG  
ACAGAAATGGATCAGGCTACTACCG

**AD10\_H1.1 Rev**

CGGCACCNCCTTTTCCTTACCACTTTCGCCACAATTGAGACGAACGTCATAGCGGTGAAG  
AGCCATGTCCCAGTTCAAATCGTTCC

**Fig. S4. Sequencing of *P. gingivalis hmuY* PCR products from clinical AD CSF.** (A) Data table includes subject ID used in Fig. 4 of main text, Mini Mental Status Exam (MMSE) score, age and sequence identity of PCR products to *P. gingivalis hmuY* DNA sequence. (B) PCR products detecting *P. gingivalis* from CSF run on agarose gel including a negative-control and a positive-control (a synthetic DNA template). (C) Sequences of PCR product for each AD subject.



**Table S1. NVD003 AD and control TMA patient data.**

| Case No. | Diagnosis | Age | M/F | PMD (hr) | Pathology - Diagnosis                                                                                                  |
|----------|-----------|-----|-----|----------|------------------------------------------------------------------------------------------------------------------------|
| AZ34     | AD        | 74  | F   | 18       | CERAD: Definite Alzheimer's disease<br>Atrophy: mod-2, Tangles: mod-2, Plaques: mod-2, ARP: C                          |
| AZ37     | AD        | 83  | M   | 4        | CERAD: Probable Alzheimer's disease<br>Atrophy: severe-3, Tangles: mod-2, Plaques: mild-1,                             |
| AZ38     | AD        | 80  | M   | 5.5      | CERAD: Definite Alzheimer's disease Braak: V; Atrophy:<br>mod-2, Tangles: mod-2, Plaques: frequent-3,                  |
| AZ39     | AD        | 74  | M   | 12       | CERAD: Definite Alzheimer's disease Braak: VI<br>Atrophy: mild-1, Tangles: mod-2, Plaques: mod-2,                      |
| AZ42     | AD        | 60  | M   | 7        | CERAD: Definite Alzheimer's disease Braak: VI<br>Atrophy: severe-3, Tangles: mild-1, Plaques: freq-3,                  |
| AZ43     | AD        | 80  | M   | 21       | CERAD: Probable Alzheimer's disease<br>Atrophy: mild-1, Tangles: mod-2, Plaques: mod-2,                                |
| AZ45     | AD        | 82  | M   | 4.5      | CERAD: Probable Alzheimer's disease<br>Atrophy: mild-1, Tangles: mod-2, Plaques: mod-2,                                |
| AZ46     | AD        | 82  | F   | 22       | CERAD: Probable Alzheimer's disease<br>Atrophy: mild-1, Tangles: mod-2, Plaques: mod-2,                                |
| AZ52     | AD        | 68  | F   | 36       | CERAD: Definite Alzheimer's disease<br>Atrophy: severe-3, Tangles: freq-3, Plaques: freq-3,                            |
| AZ55     | AD        | 51  | M   | 4        | CERAD: Probable Alzheimer's disease<br>Atrophy: mild-1, Tangles: mod-2, Plaques: mild-1,                               |
| AZ57     | AD        | 82  | F   | 14.5     | CERAD: Possible Alzheimer's disease<br>Atrophy: mild-1, Tangles: mod-2, Plaques: scant-1,                              |
| AZ58     | AD        | 75  | M   | 20       | CERAD: Definite Alzheimer's disease<br>Atrophy: severe-3, Tangles: freq-3, Plaques: freq-3,                            |
| AZ59     | AD        | 83  | M   | 15       | CERAD: Possible Alzheimer's disease<br>Atrophy: mild, Tangles: scant-1, Plaques: scant-1,                              |
| AZ61     | AD        | 87  | F   | 7.5      | Definite Alzheimer's disease                                                                                           |
| AZ64     | AD        | 67  | M   | 8        | CERAD: Definite Alzheimer's disease Atrophy: mild-1, Tangles: mod-<br>2, Plaques: freq-3, ARP: C                       |
| AZ65     | AD        | 77  | F   | 16       | CERAD: Alzheimer's disease (definite)<br>Atrophy: severe, Tangles: mod, Plaques: numerous,                             |
| AZ68     | AD        | 68  | F   | 7        | CERAD: Alzheimer's disease.<br>Atrophy:severe, Tangles:numerous, Plaques:numerous,                                     |
| AZ71     | AD        | 62  | F   | 6        | CERAD: Definite Alzheimer's disease<br>Braak: VI, Atrophy: 2/3, Tangles: 3/3, Plaques: 3/3,                            |
| AZ72     | AD        | 70  | F   | 7        | CERAD: Indicative of Alzheimer's disease Braak: V;<br>Atrophy: 0/3, Tangles: 1/3, Plaques: 3/3,                        |
| **AZ73   | AD        | 87  | F   | 14.5     | Mixed Pathology: Alzheimer's disease & Cortical Lewy Body Dis. Braak: IV,<br>Atrophy: 1/3, Tangles: 2/3, Plaques: 2/3, |
| AZ74     | AD        | 85  | F   | 16       | CERAD: definite Alzheimer's disease.<br>Braak: VI, Atrophy: 2/3, Tangles: 2/3, Plaques: 3/3,                           |
| AZ75     | AD        | 81  | M   | 25       | CERAD: definite Alzheimer's disease.<br>Braak: 5/6, Atrophy: 1/3, Tangles: 2/3, Plaques: 3/3,                          |
| AZ77     | AD        | 81  | F   | 16       | CERAD: probable Alzheimer's disease.<br>Braak: 4/6, Atrophy: 3/3, Tangles: 3/3, Plaques: 2/3,                          |
| AZ80     | AD        | 77  | M   | 4.5      | CERAD: Definite Alzheimer's disease<br>Braak: 6/6, Atrophy: 3/3, Tangles: 3/3, Plaques: 3/3,                           |
| AZ81     | AD        | 82  | F   | 18       | CERAD: definite Alzheimer's disease,<br>Braak: 6/6, Atrophy: 3/3, Tangles: 3/3, Plaques: 3/3,                          |
| AZ82     | AD        | 80  | F   | 18       | CERAD: diagnostic of Alzheimer's disease. Braak: 6/6,<br>Atrophy: 3/3, Tangles: 3/3, Plaques: 3/3,                     |
| AZ83     | AD        | 60  | F   | 16       | CERAD: Alzheimer's disease.<br>Braak: 6/6, Atrophy: 3/3, Tangles: 3/3, Plaques: 3/3,                                   |
| AZ87     | AD        | 73  | M   | 5        | CERAD: Definite Alzheimer's disease<br>Braak: 5/6, Atrophy: 2/3, Tangles: 3/3, Plaques: 3/3,                           |
| AZ89     | AD        | 80  | F   | 25       | CERAD: Definite Alzheimer's disease<br>Braak: 6/6, Atrophy: 3/3, Tangles: 3/3, Plaques: 3/3, ARP: C                    |
| H190     | Control   | 72  | F   | 19       |                                                                                                                        |
| 4734     | Control   | 79  | M   | 8        |                                                                                                                        |
| H123     | Control   | 78  | M   | 7.5      |                                                                                                                        |
| H136     | Control   | 75  | M   | 13       |                                                                                                                        |
| H155     | Control   | 61  | M   | 7        |                                                                                                                        |
| H152     | Control   | 79  | M   | 18       |                                                                                                                        |
| 4680     | Control   | 80  | M   | 12       |                                                                                                                        |
| H160     | Control   | 77  | M   | 23       |                                                                                                                        |
| H198     | Control   | 67  | F   | 27       |                                                                                                                        |
| H145     | Control   | 54  | M   | 8        |                                                                                                                        |
| H196     | Control   | 85  | M   | 15       |                                                                                                                        |
| H144     | Control   | 76  | M   | 18.5     |                                                                                                                        |
| H202     | Control   | 83  | M   | 14       |                                                                                                                        |
| H156     | Control   | 89  | M   | 19       |                                                                                                                        |
| H148     | Control   | 64  | M   | 7        |                                                                                                                        |
| H164     | Control   | 73  | M   | 13       |                                                                                                                        |
| 6013     | Control   | 69  | F   | 11.5     |                                                                                                                        |
| H121     | Control   | 64  | F   | 5        |                                                                                                                        |

|         |         |    |   |     |
|---------|---------|----|---|-----|
| H122    | Control | 72 | F | 9   |
| 02F/393 | Control | 87 | F | 11  |
| H187    | Control | 98 | F | 15  |
| H180    | Control | 73 | M | 33  |
| H150    | Control | 78 | M | 11  |
| H153    | Control | 76 | M | 8   |
| H188    | Control | 83 | M | 17  |
| H191    | Control | 77 | M | 20  |
| H127    | Control | 59 | F | 21  |
| H139    | Control | 73 | M | 5.5 |
| H137    | Control | 77 | M | 12  |

**Table S2. NVD005 AD and control TMA patient data.**

| Case No. | Diagnosis | Age | M/F | PMD (hr) | Pathology - Diagnosis                                                                                                                                                                  |
|----------|-----------|-----|-----|----------|----------------------------------------------------------------------------------------------------------------------------------------------------------------------------------------|
| A10      | AD        | 64  | M   |          | Dementia of the Alzheimer's type                                                                                                                                                       |
| A12      | AD        | 72  | M   | 9        | Confident diagnosis of Alzheimer's disease                                                                                                                                             |
| A13      | PD        | 79  | M   | 36       | Developing idiopathic Parkinson's disease                                                                                                                                              |
| AZ14     | AD        | 77  | F   | 15       | Appearances are those of a dementia of Alzheimer's type                                                                                                                                |
| AZ15     | AD/PD     | 80  | M   | 3.5      | Cerebral cortical findings> AD; SN > idiopathic PD                                                                                                                                     |
| AZ24     | AD        | 82  | F   | 97       | CERAD: Definite Alzheimer's disease<br>Tangles: mod-2, Plaques: freq -3, ARP: C<br>Atrophy: mild-1,                                                                                    |
| AZ33     | AD        | 65  | M   | 20       | CERAD: Definite Alzheimer's disease<br>Tangles: mild-1, Plaques: mod-2, ARP: C<br>Atrophy: mid-1,                                                                                      |
| AZ60     | AD        | 83  | M   | 8        | Alzheimer's disease                                                                                                                                                                    |
| AZ62     | AD/Epil   | 80  | F   | 11       | Alzheimer's disease [+ history of epilepsy]                                                                                                                                            |
| AZ78     | AD        | 87  | F   | 7        | CERAD: probable Alzheimer's disease.<br>Atrophy: 2/3, Tangles: 2/3, Plaques: 1/3, ARP: B<br>Braak: 3/6,                                                                                |
| AZ85     | AD        | 85  | M   | 57       | CERAD: probable Alzheimer's disease<br>Tangles: 2/3, Plaques: 1/3, ARP: B<br>Braak: 4/6, Atrophy: 0/3,                                                                                 |
| AZ86     | AD        | 92  | M   | 8.5      | CERAD: possible Alzheimer's disease<br>Tangles: 1/3, Plaques: 1/3, ARP: A<br>Braak: 3/6, Atrophy: 0/3,                                                                                 |
| AZ88     | AD        | 83  | M   | 21       | CERAD: Definite Alzheimer's disease<br>Atrophy: 2/3, Tangles: 3/3, Plaques: 3/3, ARP: C<br>Braak: 4/6;                                                                                 |
| AZ89     | AD        | 80  | F   | 25       | CERAD: Definite Alzheimer's disease<br>Atrophy: 3/3, Tangles: 3/3, Plaques: 3/3, ARP: C<br>Braak: 6/6;                                                                                 |
| AZ90     | AD        | 73  | M   | 4        | CERAD: Definite Alzheimer's disease<br>Atrophy: 3/3, Tangles: 3/3, Plaques: 3/3, ARP: C<br>Braak: 4/6;                                                                                 |
| AZ91     | AD        | 80  | M   | 29       | CERAD: Definite Alzheimer's disease<br>Atrophy: 2/3, Tangles: 3/3, Plaques: 3/3, ARP: C<br>Braak: 5/6;                                                                                 |
| AZ92     | AD        | 93  | F   | 11.5     | CERAD: Probable Alzheimer's disease<br>3/3, Tangles: 3/3, Plaques: 3/3, ARP: B<br>Braak: 4/6, Atrophy:                                                                                 |
| AZ93     | AD        | 83  | M   | 15       | CERAD: Probable Alzheimer Disease<br>paque density); Braak Stage V<br>(mod                                                                                                             |
| AZ95     | AD        | 69  | M   | 12       | CERAD: Alzheimer's disease.<br>Tangles: 2/3, Plaques: 3/3, ARP: C<br>Braak: 5/6, Atrophy: 3/3,                                                                                         |
| AZ96     | AD        | 74  | F   | 8.5      | CERAD: Alzheimer's disease<br>3/3, Tangles: 3/3, Plaques: 3/3, ARP: C<br>Braak: 5/6; Atrophy:                                                                                          |
| AZ98     | AD        | 91  | F   | 20.5     | Alzheimer's disease                                                                                                                                                                    |
| AZ99     | AD        | 94  | F   | 8.5      | Alz-type neuropath. change (A3, B3, C2), Braak V-VI; small vessel cerebrovascular wth focal lacunar infarction; focal cerebral amyloid angiopathy                                      |
| AZ101    | AD        | 75  | M   | 12.5     | AD neuropath. change (A3, B3, C2), Braak VI; cerebral amyloid angiopathy; old infarction in R temporo-occipital; small vessel cerebrovascular disease                                  |
| AZ102    | AD        | 84  | F   | 14.5     | Alz-type neuropathological change (A3, B2, C2), Braak IV; hyaline arteriosclerosis                                                                                                     |
| AZ103    | AD        | 87  | M   | <24      | Alz-type neuropathologic change (A3, B2, C2), Braak IV; cerebral amyloid angiopathy; small vessel disease                                                                              |
| AZ107    | AD        | 86  | M   |          | Intermediate AD change (A2, B3, C1), Braak VI; Amygdala predominant Lewy body disease; deep small vessel disease; cerebral amyloid angiopathy                                          |
| AZ108    | AD        | 94  | F   | 11.5     | Consistent with Alzheimer's disease (NIA-AA score A3 B3 C2, high degree of AD change), LBD, amygdala predominant, cerebral amyloid angiopathy, hyaline arteriosclerosis                |
| AZ109    | AD        | 90  | F   | 31       | Consistent with Alzheimer's disease (NIA-AA score A3 B2 C1, intermediate AD change), cerebral amyloid angiopathy, hyaline arteriosclerosis                                             |
| AZ110    | AD        | 86  | F   | 15       | Consistent with Alzheimer's disease (NIA-AA score A3 B3 C2, high AD change); hippocampal sclerosis with associated TDP-43 path; LBD, diffuse, focal cerebral amyloid angiopathy; small |
| H151     | control   | 64  | F   | 5        |                                                                                                                                                                                        |
| H159     | control   | 53  | M   | 16.5     |                                                                                                                                                                                        |

|             |         |    |   |       |
|-------------|---------|----|---|-------|
| <b>H165</b> | control | 43 | F | 26    |
| <b>H168</b> | control | 63 | M | 9     |
| <b>H169</b> | control | 81 | M | 24    |
| <b>H170</b> | control | 60 | M | 17    |
| <b>H174</b> | control | 59 | M | 24.5  |
| <b>H177</b> | control | 22 | M | 21    |
| <b>H183</b> | control | 61 | M | 10    |
| <b>H184</b> | control | 35 | M | 20    |
| <b>H185</b> | control | 50 | M | 28-31 |
| <b>H186</b> | control | 68 | M | 21    |
| <b>H192</b> | control | 65 | F | 23-28 |
| <b>H194</b> | control | 68 | M | 22.5  |
| <b>H195</b> | control | 65 | M | 18    |
| <b>H197</b> | control | 19 | F | 40    |
| <b>H200</b> | control | 56 | M | 23    |
| <b>H209</b> | control | 48 | M | 23    |
| <b>H211</b> | control | 41 | M | 8     |
| <b>H215</b> | control | 67 | F | 23.5  |
| <b>H226</b> | control | 73 | F | 48    |
| <b>H230</b> | control | 57 | F | 32    |
| <b>H231</b> | control | 65 | M | 8     |
| <b>H238</b> | control | 63 | F | 16    |
| <b>H239</b> | control | 64 | M | 15.5  |
| <b>H240</b> | control | 73 | M | 26.5  |
| <b>H242</b> | control | 61 | M | 19.5  |
| <b>H243</b> | control | 77 | F | 13    |
| <b>H245</b> | control | 63 | M | 20    |

**Table S3. Tau fragments identified by MS after gingipain exposure.**

| No. observations following 1 nm Kgp/Rgp | No. observations following 10 nm Kgp/Rgp | Peptide sequence                                           | Score | Uniprot protein accession numbers*                                                                                                                                                                                             |
|-----------------------------------------|------------------------------------------|------------------------------------------------------------|-------|--------------------------------------------------------------------------------------------------------------------------------------------------------------------------------------------------------------------------------|
| 1                                       | 19                                       | HLSNVSTSGSIDMVDSPQLATLADEVASLAK                            | 32.14 | A0A0G2JMX7, A0A024R9Y0, B4DSE3, B4DSB3, A0A024RA17, A0A0G2JPD5, A0A0G2JS76, A0A024R9Y1, P10636, A0A024RA19, I3L170, A0A0G2JQJ7, B3KTM0                                                                                         |
| 1                                       | 9                                        | qAAAQPHTEIPEGTTAEAEAGIDGTPSLEDEAAGHVTOAR                   | 31.34 | A0A024RA17                                                                                                                                                                                                                     |
|                                         | 15                                       | QAAQPHTEIPEGTTAEAEAGIDGTPSLEDEAAGHVTOAR                    | 29.75 | A0A024RA17                                                                                                                                                                                                                     |
|                                         | 20                                       | KDGGGYTHMQDQEGDTDAGLKESPLQPTEDGSEEPGSETSDAK                | 28.61 | A0A0G2JMX7, A0A024RA19, A0A0G2JQJ7, A0A024RA17, A0A0G2JPD5, A0A0G2JS76, A0A024R9Y1, P10636                                                                                                                                     |
| 3                                       | 3                                        | HLSNVSTSGSIDMVDSPQLATLADEVASLAKQGL                         | 28.58 | A0A0G2JMX7, A0A024R9Y0, B4DSE3, B4DSB3, A0A024RA17, A0A0G2JPD5, A0A0G2JS76, A0A024R9Y1, P10636, A0A024RA19, I3L170, A0A0G2JQJ7, B3KTM0                                                                                         |
| 1                                       | 7                                        | HLSNVSTSGSIDMVDSPQLATLADEVASLAK                            | 28.58 | A0A0G2JMX7, A0A024R9Y0, B4DSE3, B4DSB3, A0A024RA17, A0A0G2JPD5, A0A0G2JS76, A0A024R9Y1, P10636, A0A024RA19, I3L170, A0A0G2JQJ7, B3KTM0                                                                                         |
|                                         | 5                                        | DNIKHVPGGGVQIVYKPVLDLKVTSK                                 | 28.18 | A0A0G2JMX7, A0A024R9Y0, A0A0G2JQJ7, A0A024RA17, A0A0G2JPD5, A0A0G2JS76, A0A024R9Y1, P10636                                                                                                                                     |
|                                         | 5                                        | qFEFEVMEHDAGTYGLGDR                                        | 27.84 | A0A0G2JMX7, A0A024R9Y0, B4DSB3, A0A024RA17, A0A0G2JPD5, A0A0G2JS76, A0A024R9Y1, P10636, A0A024RA19, A0A0G2JQJ7, I3L2Z2                                                                                                         |
| 1                                       | 2                                        | DQGGYTHMQDQEGDTDAGLKESPLQPTEDGSEEPGSETSDAK                 | 27.71 | A0A0G2JMX7, A0A024RA19, A0A0G2JQJ7, A0A024RA17, A0A0G2JPD5, A0A0G2JS76, A0A024R9Y1, P10636                                                                                                                                     |
|                                         | 5                                        | HLSNVSTSGSIDMVDSPQLATLADEVASLAKQGL                         | 26.96 | A0A0G2JMX7, A0A024R9Y0, B4DSE3, B4DSB3, A0A024RA17, A0A0G2JPD5, A0A0G2JS76, A0A024R9Y1, P10636, A0A024RA19, I3L170, A0A0G2JQJ7, B3KTM0                                                                                         |
|                                         | 42                                       | TDHGAEIVYKSPVWGDTSR                                        | 26.04 | A0A0G2JMX7, A0A024R9Y0, B4DSE3, B4DSB3, A0A024RA17, A0A0G2JPD5, A0A0G2JS76, A0A024R9Y1, P10636, A0A024RA19, I3L170, A0A0G2JQJ7, B3KTM0                                                                                         |
|                                         | 10                                       | QFEFEVMEHDAGTYGLGDR                                        | 25.09 | A0A0G2JMX7, A0A024R9Y0, B4DSB3, A0A024RA17, A0A0G2JPD5, A0A0G2JS76, A0A024R9Y1, P10636, A0A024RA19, A0A0G2JQJ7, I3L2Z2                                                                                                         |
|                                         | 2                                        | ESPLQPTEDGSEEPGSETSDAKSTPTAEDVTAPLVDEGAPGK                 | 25.03 | A0A0G2JMX7, A0A024R9Y0, A0A0G2JQJ7, A0A024RA17, A0A0G2JPD5, A0A0G2JS76, A0A024R9Y1, P10636                                                                                                                                     |
|                                         | 15                                       | KDGGGYTHMQDQEGDTDAGLKESPLQPTEDGSEEPGSETSDAK                | 24.66 | A0A0G2JMX7, A0A024RA19, A0A0G2JQJ7, A0A024RA17, A0A0G2JPD5, A0A0G2JS76, A0A024R9Y1, P10636                                                                                                                                     |
|                                         | 4                                        | LQTAPVMPDLKLVKSKIGSTENLK                                   | 24.49 | A0A0G2JMX7, A0A024R9Y0, B4DSB3, A0A024RA17, A0A0G2JPD5, A0A0G2JS76, A0A024R9Y1, P10636, A0A024RA19, I3L170, A0A0G2JQJ7, B3KTM0                                                                                                 |
|                                         | 3                                        | qFEFEVMEHDAGTYGLGDR                                        | 23.7  | A0A0G2JMX7, A0A024R9Y0, B4DSB3, A0A024RA17, A0A0G2JPD5, A0A0G2JS76, A0A024R9Y1, P10636, A0A024RA19, A0A0G2JQJ7, I3L2Z2                                                                                                         |
|                                         | 1                                        | STPTAEDVTAPLVDEGAPGQAAAQPHTEIPEGTTAEAEAGIDGTPSLEDEAAGHVTOA | 23.63 | A0A024RA17                                                                                                                                                                                                                     |
|                                         | 6                                        | ESPLQPTEDGSEEPGSETSDAK                                     | 23.15 | A0A0G2JMX7, A0A024R9Y0, A0A0G2JQJ7, A0A024RA17, A0A0G2JPD5, A0A0G2JS76, A0A024R9Y1, P10636                                                                                                                                     |
|                                         | 3                                        | IGSLDNITHVPGGGNK                                           | 22.88 | A0A0G2JMX7, A0A024R9Y0, B4DSE3, B4DSB3, A0A024RA17, A0A0G2JPD5, A0A0G2JS76, A0A024R9Y1, P10636, A0A024RA19, I3L170, A0A0G2JQJ7, B3KTM0                                                                                         |
|                                         | 2                                        | AAQPHTEIPEGTTAEAEAGIDGTPSLEDEAAGHVTOAR                     | 22.1  | A0A024RA17                                                                                                                                                                                                                     |
|                                         | 8                                        | VQSKIGSLDNITHVPGGGNK                                       | 22.04 | A0A0G2JMX7, A0A024R9Y0, B4DSE3, B4DSB3, A0A024RA17, A0A0G2JPD5, A0A0G2JS76, A0A024R9Y1, P10636, A0A024RA19, I3L170, A0A0G2JQJ7, B3KTM0                                                                                         |
|                                         | 9                                        | QFEFEVMEHDAGTYGLGDR                                        | 21.6  | A0A0G2JMX7, A0A024R9Y0, B4DSB3, A0A024RA17, A0A0G2JPD5, A0A0G2JS76, A0A024R9Y1, P10636, A0A024RA19, A0A0G2JQJ7, I3L2Z2                                                                                                         |
|                                         | 12                                       | HVPGGGVQIVYKPVLDLKVTSK                                     | 21.34 | A0A0G2JMX7, A0A024R9Y0, A0A0G2JQJ7, A0A024RA17, A0A0G2JPD5, A0A0G2JS76, A0A024R9Y1, P10636                                                                                                                                     |
|                                         | 8                                        | LQTAPVMPDLKLVKSK                                           | 21.24 | A0A0G2JMX7, A0A024R9Y0, B4DSB3, A0A024RA17, A0A0G2JPD5, A0A0G2JS76, A0A024R9Y1, P10636, A0A024RA19, I3L170, A0A0G2JQJ7, B3KTM0                                                                                                 |
|                                         | 19                                       | TPPAPKTPSSGPEPKSGDR                                        | 21.06 | A0A024R9Y0, A0A024RA17, A0A0G2JPD5, A0A024R9Y1, P10636, A0A024RA19, I3L170, A0A0G2JQJ7, B3KTM0                                                                                                                                 |
|                                         | 8                                        | SGYSSPGSPGTPGSR                                            | 20.52 | A0A0G2JMX7, A0A024R9Y0, A0A024RA17, A0A0G2JPD5, A0A0G2JS76, A0A024R9Y1, P10636, A0A024RA19, I3L170, A0A0G2JQJ7, B3KTM0                                                                                                         |
|                                         | 10                                       | DNIKHVPGGGVQIVYKPVLDLKVTSK                                 | 19.35 | A0A0G2JMX7, A0A024R9Y0, A0A0G2JQJ7, A0A024RA17, A0A0G2JPD5, A0A0G2JS76, A0A024R9Y1, P10636                                                                                                                                     |
|                                         | 9                                        | STPTAEDVTAPLVDEGAPGK                                       | 18.7  | A0A0G2JMX7, A0A0G2JQJ7, A0A024RA17, A0A0G2JPD5, A0A0G2JS76, A0A024R9Y1, P10636                                                                                                                                                 |
|                                         | 4                                        | LQTAPVMPDLKLVKSK                                           | 18.63 | A0A0G2JMX7, A0A024R9Y0, B4DSB3, A0A024RA17, A0A0G2JPD5, A0A0G2JS76, A0A024R9Y1, P10636, A0A024RA19, I3L170, A0A0G2JQJ7, B3KTM0                                                                                                 |
|                                         | 9                                        | LQTAPVMPDLKLVKSK                                           | 18.29 | A0A0G2JMX7, A0A024R9Y0, B4DSB3, A0A024RA17, A0A0G2JPD5, A0A0G2JS76, A0A024R9Y1, P10636, A0A024RA19, I3L170, A0A0G2JQJ7, B3KTM0                                                                                                 |
|                                         | 13                                       | HVPGGGVQIVYKPVLDLKVTSK                                     | 18.19 | A0A0G2JMX7, A0A024R9Y0, A0A0G2JQJ7, A0A024RA17, A0A0G2JPD5, A0A0G2JS76, A0A024R9Y1, P10636                                                                                                                                     |
|                                         | 3                                        | LQTAPVMPDLKLVKSKIGSTENLK                                   | 17.97 | A0A0G2JMX7, A0A024R9Y0, B4DSB3, A0A024RA17, A0A0G2JPD5, A0A0G2JS76, A0A024R9Y1, P10636, A0A024RA19, I3L170, A0A0G2JQJ7, B3KTM0                                                                                                 |
| 1                                       | 1                                        | SRLQTPVMPDLKLVKSK                                          | 17.81 | A0A0G2JMX7, A0A024R9Y0, B4DSB3, A0A024RA17, A0A0G2JPD5, A0A0G2JS76, A0A024R9Y1, P10636, A0A024RA19, I3L170, A0A0G2JQJ7, B3KTM0                                                                                                 |
|                                         | 13                                       | VQIINKKLDLNVQSK                                            | 16.51 | A0A0G2JMX7, A0A024R9Y0, A0A0G2JQJ7, A0A024RA17, A0A0G2JPD5, A0A0G2JS76, A0A024R9Y1, P10636                                                                                                                                     |
|                                         | 15                                       | AKTDHGAEIVYKSPVWGDTSR                                      | 15.89 | A0A0G2JMX7, A0A024R9Y0, B4DSE3, B4DSB3, A0A024RA17, A0A0G2JPD5, A0A0G2JS76, A0A024R9Y1, P10636, A0A024RA19, I3L170, A0A0G2JQJ7, B3KTM0                                                                                         |
|                                         | 8                                        | TPSLPTPTR                                                  | 15.76 | A0A0G2JMX7, A0A024R9Y0, A0A024RA17, A0A0G2JPD5, A0A0G2JS76, A0A024R9Y1, P10636, A0A024RA19, I3L170, A0A0G2JQJ7, B3KTM0                                                                                                         |
|                                         | 1                                        | LDLNVQSK                                                   | 14.85 | A0A0G2JMX7, A0A024R9Y0, A0A0G2JQJ7, A0A024RA17, A0A0G2JPD5, A0A0G2JS76, A0A024R9Y1, P10636                                                                                                                                     |
| 1                                       | 21                                       | SRTPLSPTPTR                                                | 14.25 | A0A0G2JMX7, A0A024R9Y0, A0A024RA17, A0A0G2JPD5, A0A0G2JS76, A0A024R9Y1, P10636, A0A024RA19, I3L170, A0A0G2JQJ7, B3KTM0                                                                                                         |
|                                         | 2                                        | NVSSTSGSIDMVDSPQLATLADEVASLAK                              | 13.84 | A0A0G2JMX7, A0A024R9Y0, B4DSE3, B4DSB3, A0A024RA17, A0A0G2JPD5, A0A0G2JS76, A0A024R9Y1, P10636, A0A024RA19, I3L170, A0A0G2JQJ7, B3KTM0                                                                                         |
|                                         | 1                                        | LSNVSTSGSIDMVDSPQLATLADEVASLAK                             | 13.58 | A0A0G2JMX7, A0A024R9Y0, B4DSE3, B4DSB3, A0A024RA17, A0A0G2JPD5, A0A0G2JS76, A0A024R9Y1, P10636, A0A024RA19, I3L170, A0A0G2JQJ7, B3KTM0                                                                                         |
|                                         | 5                                        | SPVWGDTSR                                                  | 11.9  | A0A0G2JMX7, A0A024R9Y0, B4DSE3, B4DSB3, A0A024RA17, A0A0G2JPD5, A0A0G2JS76, A0A024R9Y1, P10636, A0A024RA19, I3L170, A0A0G2JQJ7, B3KTM0                                                                                         |
|                                         | 2                                        | LQTAPVMPDLK                                                | 10.34 | A0A0G2JMX7, A0A024R9Y0, B4DSB3, A0A024RA17, A0A0G2JPD5, A0A0G2JS76, A0A024R9Y1, P10636, A0A024RA19, I3L170, A0A0G2JQJ7, B3KTM0                                                                                                 |
|                                         | 2                                        | IGSLDNITHVPGGGNKKIETHKLTFR                                 | 9.66  | A0A0G2JMX7, A0A024R9Y0, B4DSE3, B4DSB3, A0A024RA17, A0A0G2JPD5, A0A0G2JS76, A0A024R9Y1, P10636, A0A024RA19, I3L170, A0A0G2JQJ7, B3KTM0                                                                                         |
|                                         | 1                                        | qAAAQPHTEIPEGTTAEAEAGIDGTPSLEDEAAGHVTOARMSK                | 9.43  | A0A024RA17                                                                                                                                                                                                                     |
|                                         | 14                                       | ENAKAKTDHGAEIVYKSPVWGDTSR                                  | 9.42  | A0A0G2JMX7, A0A024R9Y0, B4DSE3, B4DSB3, A0A024RA17, A0A0G2JPD5, A0A0G2JS76, A0A024R9Y1, P10636, A0A024RA19, I3L170, A0A0G2JQJ7, B3KTM0                                                                                         |
|                                         | 2                                        | GADGKTKIATPR                                               | 8.91  | A0A0G2JMX7, A0A024R9Y0, A0A024RA17, A0A0G2JPD5, A0A0G2JS76, A0A024R9Y1, P10636, A0A024RA19, I3L170, A0A0G2JQJ7, B3KTM0                                                                                                         |
|                                         | 27                                       | GAAPPQKQGANATR                                             | 8.9   | A0A0G2JMX7, A0A024R9Y0, A0A024RA17, A0A0G2JPD5, A0A0G2JS76, A0A024R9Y1, P10636, A0A024RA19, I3L170, A0A0G2JQJ7, B3KTM0                                                                                                         |
|                                         | 1                                        | HLSNVSTSGSIDMVDSPQLATLADEVASLAK                            | 8.7   | A0A0G2JMX7, A0A024R9Y0, B4DSE3, B4DSB3, A0A024RA17, A0A0G2JPD5, A0A0G2JS76, A0A024R9Y1, P10636, A0A024RA19, I3L170, A0A0G2JQJ7, B3KTM0                                                                                         |
|                                         | 1                                        | VQSKIGSLDNITHVPGGGNK                                       | 8.24  | A0A0G2JMX7, A0A024R9Y0, B4DSE3, B4DSB3, A0A024RA17, A0A0G2JPD5, A0A0G2JS76, A0A024R9Y1, P10636, A0A024RA19, I3L170, A0A0G2JQJ7, B3KTM0                                                                                         |
| 1                                       | 3                                        | LQTAPVMPDLK                                                | 7.98  | A0A0G2JMX7, A0A024R9Y0, B4DSB3, A0A024RA17, A0A0G2JPD5, A0A0G2JS76, A0A024R9Y1, P10636, A0A024RA19, I3L170, A0A0G2JQJ7, B3KTM0                                                                                                 |
|                                         | 1                                        | SNVSTSGSIDMVDSPQLATLADEVASLAK                              | 7.91  | A0A0G2JMX7, A0A024R9Y0, B4DSE3, B4DSB3, A0A024RA17, A0A0G2JPD5, A0A0G2JS76, A0A024R9Y1, P10636, A0A024RA19, I3L170, A0A0G2JQJ7, B3KTM0                                                                                         |
|                                         | 4                                        | IPAKTTPAPKTPSSGPEPKSGDR                                    | 7.86  | A0A024R9Y0, A0A024RA17, A0A0G2JPD5, A0A024R9Y1, P10636, A0A024RA19, I3L170, A0A0G2JQJ7, B3KTM0                                                                                                                                 |
|                                         | 1                                        | LQTAPVMPDLKLVKSKIGSTENLKHQPGGGK                            | 7.6   | A0A0G2JMX7, A0A024R9Y0, B4DSB3, A0A024RA17, A0A0G2JPD5, A0A0G2JS76, A0A024R9Y1, P10636, A0A024RA19, I3L170, A0A0G2JQJ7, B3KTM0                                                                                                 |
|                                         | 8                                        | TPPAPKTPSSGPEPKSGDR                                        | 7.1   | A0A024R9Y0, A0A024RA17, A0A0G2JPD5, A0A024R9Y1, P10636, A0A024RA19, I3L170, A0A0G2JQJ7, B3KTM0                                                                                                                                 |
|                                         | 4                                        | TPSSGPEPKSGDR                                              | 6.52  | A0A024R9Y0, A0A024RA17, A0A0G2JPD5, A0A024R9Y1, P10636, A0A024RA19, I3L170, A0A0G2JQJ7, B3KTM0                                                                                                                                 |
|                                         | 1                                        | HLSNVSTSGSIDMVDSP                                          | 5.94  | A0A0G2JMX7, A0A024R9Y0, B4DSE3, B4DSB3, A0A024RA17, A0A0G2JPD5, A0A0G2JS76, A0A024R9Y1, P10636, A0A024RA19, I3L170, A0A0G2JQJ7, B3KTM0                                                                                         |
|                                         | 1                                        | STGSIDMVDSPQLATLADEVASLAK                                  | 5.79  | A0A0G2JMX7, A0A024R9Y0, B4DSE3, B4DSB3, A0A024RA17, A0A0G2JPD5, A0A0G2JS76, A0A024R9Y1, P10636, A0A024RA19, I3L170, A0A0G2JQJ7, B3KTM0                                                                                         |
|                                         | 1                                        | HQPGGKQVIINKKLDLNVQSK                                      | 5.5   | A0A0G2JMX7, A0A024R9Y0, A0A0G2JQJ7, A0A024RA17, A0A0G2JPD5, A0A0G2JS76, A0A024R9Y1, P10636, A0A024RA19, I3L170, A0A0G2JQJ7, B3KTM0                                                                                             |
|                                         | 1                                        | LQTAPVMPDLKN                                               | 5.19  | A0A0G2JMX7, A0A024R9Y0, B4DSB3, A0A024RA17, A0A0G2JPD5, A0A0G2JS76, A0A024R9Y1, P10636, A0A024RA19, I3L170, A0A0G2JQJ7, B3KTM0                                                                                                 |
|                                         | 1                                        | AVVR                                                       | 4.53  | A0A0G2JMX7, A0A024R9Y0, Q96PD2, A0A0G2JPD5, A0A0G2JS76, P10636, Q5T1A1, O75128, Q01813, Q5H9F3, Q8IZY2, Q8NEM2, B4DSB3, A0A024RA17, A0A024R9Y1, Q969Y0, P08237, Q8TE06, A0A024RA19, I3L170, Q6L8Q7, A0A0G2JQJ7, A6NC98, B3KTM0 |
|                                         | 1                                        | NVSSTSGSIDMVDSPQLATLADEVASLAK                              | 4.11  | A0A0G2JMX7, A0A024R9Y0, B4DSE3, B4DSB3, A0A024RA17, A0A0G2JPD5, A0A0G2JS76, A0A024R9Y1, P10636, A0A024RA19, I3L170, A0A0G2JQJ7, B3KTM0                                                                                         |
|                                         | 1                                        | VAVVR                                                      | 4     | A0A0G2JMX7, A0A024R9Y0, B4DSB3, A0A024RA17, A0A0G2JPD5, A0A0G2JS76, A0A024R9Y1, P10636, A0A024RA19, I3L170, A0A0G2JQJ7, B3KTM0                                                                                                 |

\*LC-MS/MS raw data searched against Uniprot Human + *Porphyromonas gingivalis* + decoy sequence databases.

**Table S4. Demographic information of patients with CP who donated saliva and subgingival plaque samples. (See Fig. 8 of main text.)**

| ID   | Gender<br>F/M | Age | Race<br>W=White<br>B=Black | Ethnicity<br>H=Hispanic<br>NH=Non-Hispanic | Periodontal Disease Diagnosis | Duration Periodontal<br>Dx | Previous Periodontal<br>Tx                          | <u>Medical Hx</u> | <u>Current<br/>Medications</u>              | <u>Relavant<br/>Family Hx</u> |
|------|---------------|-----|----------------------------|--------------------------------------------|-------------------------------|----------------------------|-----------------------------------------------------|-------------------|---------------------------------------------|-------------------------------|
| CB01 | M             | 56  | W                          | NH                                         | Severe chronic periodontitis  | 3 years ago                | Scaling and Root Planing<br>and Surgery 2013        | None reported     | None reported                               | No                            |
| CB02 | M             | 59  | W                          | NH                                         | Severe chronic periodontitis  | 4 years ago                | None reported                                       | None<br>reported  | None reported                               | No                            |
| CB03 | F             | 79  | W                          | NH                                         | Severe chronic periodontitis  | 3 years ago                | Scaling and root Planing<br>in the past year        | Osteoarthritis    | Tylenol, as needed                          | No                            |
| CB04 | M             | 61  | B                          | NH                                         | Severe chronic periodontitis  | 7 years ago                | Scaling and root Planing<br>in the past year        | Asthma            | Albuterol and Flovent<br>inhaler, as needed | No                            |
| CB05 | M             | 67  | W                          | NH                                         | Severe chronic periodontitis  | 13 years ago               | Scaling and root Planing<br>and surgical Tx in 2012 | None reported     | Baby aspirin                                | No                            |
